# Selectivity and escapement behaviour of five commercial fishery species in standard square- and diamond-mesh codends

Rikke P. Frandsen, Niels Madsen, and Ludvig A. Krag

Frandsen, R. P., Madsen, N., and Krag, L. A. 2010. Selectivity and escapement behaviour of five commercial fishery species in standard square- and diamond-mesh codends. – ICES Journal of Marine Science, 67: 1721–1731.

The Danish fishery for *Nephrops* (*Nephrops norvegicus*) is often conducted in a mixed-species setting, characterized by high rates of discards of several target species, including *Nephrops* and cod (*Gadus morhua*). Experiments were conducted to investigate and compare the selective properties of a standard 70 mm square-mesh codend (standard SMC) and a standard 90 mm diamond-mesh codend (standard DMC). Selectivity estimates for five commercial species are provided for both codends. The standard SMC yielded higher estimates of length at 50% retention/mesh size (hereafter SF) for *Nephrops* and roundfish than did the standard DMC, but no effect of codend type on SF was found for plaice (*Pleuronectes platessa*). Moreover, a novel codend cover design allowed assessment of the preferred direction of escapement in the codend. Whiting (*Merlangius merlangus*) and *Nephrops* showed pronounced, but opposite, vertical preference in the direction of escapement, with whiting escaping upwards and *Nephrops* downwards. A significant ( $p < 0.05$ ) difference in the direction of escapement between the two codends was found for haddock (*Melanogrammus aeglefinus*) and whiting. Owing to the relatively small catches, the outcome is probably most applicable to *Nephrops*-directed fisheries under similar conditions, and caution should be taken not to extrapolate the results to other fisheries.

**Keywords:** cover, escapement behaviour, *Gadus morhua*, Kattegat, mixed-species fishery, *Nephrops norvegicus*, *Pleuronectes platessa*, selectivity, Skagerrak, square-mesh codend, trawl.

Received 20 May 2009; accepted 9 April 2010; advance access publication 27 May 2010.

R. P. Frandsen, N. Madsen, and L. A. Krag: DTU Aqua, National Institute of Aquatic Resources, North Sea Science Park, PO Box 101, DK-9850 Hirtshals, Denmark. Correspondence to R. P. Frandsen: tel: +45 35883200; fax: +45 33963260; e-mail: rif@aqu.dtu.dk.

## Introduction

Discarding of commercial species takes place at high rates in Danish mixed-species fisheries in the Kattegat and Skagerrak (Krag *et al.*, 2008). Among other species, *Nephrops* (*Nephrops norvegicus*), cod (*Gadus morhua*), and plaice (*Pleuronectes platessa*) are targeted. Discarding of cod gives cause for particular concern, because the International Council for the Exploration of the Seas (ICES) states that the stock is at a historically low level in the Kattegat and overfished in the Skagerrak (ICES, 2009). In recent experiments with commercial trawls, >50% by number of *Nephrops* caught were below the minimum landing size (MLS; 40 mm carapace length, CL; Krag *et al.*, 2008; Frandsen *et al.*, 2009). Investigations have shown that survival of discarded *Nephrops* ranges from 12 to 85% (Evans *et al.*, 1994; Castro *et al.*, 2003; Harris and Ulmestrand, 2004), while survival of the *Nephrops* that escape from the trawl during the fishing process is ~82% (Wileman *et al.*, 1999). Hence, the overall survival of undersized *Nephrops* could be improved significantly by making the fishing gear more size-selective.

Theoretically and experimentally, both mesh size and mesh shape affects the  $L_{50}$  ( $L_x$  is the length at which  $x\%$  is retained) and the SR (selection range =  $L_{75} - L_{25}$ ) of *Nephrops* significantly (ICES, 2007; Frandsen *et al.*, 2010). Compared with diamond-mesh codends, square-mesh codends with the same nominal mesh size are more size-selective, i.e. have a higher  $L_{50}$  and a lower SR (ICES, 2007; Frandsen *et al.*, 2010). Square-mesh codends also have good selective properties for roundfish such

as cod (Halliday *et al.*, 1999), haddock (Robertson and Stewart, 1988; Halliday *et al.*, 1999), and whiting (Robertson and Stewart, 1988). For some species of flatfish, however, square-mesh codends yield lower values of  $L_{50}$  than the equivalent diamond-mesh codends (Walsh *et al.*, 1992; He, 2007). Therefore, the selective properties of square- and diamond-mesh codends differ for different morphological groups, such as for flatfish, roundfish, and *Nephrops*. The optimum mesh shape is theoretically related to the cross-sectional shape of the species (Herrmann *et al.*, 2009).

With knowledge of species-specific behaviour and the different selective properties, selectivity can be optimized by combining different netting materials in the same codend. Many earlier studies on species-specific behaviour focused on species separation at the mouth of the trawl (Main and Sangster, 1982). Once the fish have entered a trawl, they usually stay clear of the netting panels unless the straight path is blocked (Glass *et al.*, 1993; Glass and Wardle, 1995), so they travel towards the codend, where most escape attempts are made just in front of the catch build-up (O'Neill *et al.*, 2003; Jones *et al.*, 2008). Previous investigations of species-specific behaviour in the aft end of a trawl and in the codend have shown that *Nephrops* tend to remain low in the net (Briggs, 1992; Krag *et al.*, 2009a). Plaice also seem to stay low in the aft end of the trawl, but cod have a more uniform vertical distribution (Krag *et al.*, 2009a), and haddock and whiting stay high (Krag *et al.*, 2009a). Cod, haddock, and whiting have been reported to escape through square-mesh windows in the extension and upper panel of the codend (cod:

Madsen *et al.*, 2010; haddock: Frandsen *et al.*, 2009; whiting: Briggs, 1992). We here document the vertical direction of escapement through the codend for five different species, so providing additional information on the selection process.

A 90 mm diamond-mesh codend with a 120 mm square-mesh window is included in the legislation for the Kattegat and the Skagerrak, and is commonly used. For most commercial species, however, the SR of this codend is high (e.g. cod 10.93 cm, haddock 18.56 cm; Frandsen *et al.*, 2009), so the risk of discarding and the loss of legal-sized fish is high. In addition, a 70 mm square-mesh codend is allowed, but only in combination with a rigid sorting grid (35 mm bar spacing). Selectivity experiments with square-mesh codends have been conducted in other *Nephrops* fisheries, using relatively small meshes (40–55 mm; Stergiou *et al.*, 1997; Bahamon *et al.*, 2006; Sala and Lucchetti, 2010), but only one experiment testing a square-mesh codend (60 mm) in the Skagerrak and Kattegat has been reported (Larsvik and Ulmestrand, 1992). The existing selectivity estimates for *Nephrops* in a 70 mm square-mesh codend are therefore based on extrapolations and assumptions.

To assess the selective properties of each type of netting, the codends we tested had no additional selective devices. Two codends, a commercial 70 mm (3 mm single twine) square-mesh codend (standard SMC) and a commercially used 90 mm (5 mm double twine) diamond-mesh codend (standard DMC), were investigated in terms of their selectivity for *Nephrops*, cod, haddock, plaice, and whiting. Also, the species-specific differences in the direction of escapement through the codend meshes were investigated with the aim of obtaining knowledge of the potential for species separation in the codend. Further, our experimental setup allowed between-trial variations in the estimated selection parameters to be assessed, because two trials using different vessels, trawls, and towing time were conducted.

## Experimental methods

The selectivity of the codends was estimated using the covered codend method (Wileman *et al.*, 1996). Two codends were tested: a standard DMC with a nominal mesh size of 90 mm and a standard SMC with a nominal mesh size of 70 mm. Further information on the netting material is given in Figure 1. The standard DMC had 92 meshes around and the standard SMC had 90 bars around. On the basis of estimates of mesh openings in the standard DMC ranging from 0° to 35° and lengths of the tensionless bars in the standard SMC ranging from 47 to 94% of the stretched bar length

(Frandsen *et al.*, 2010), the circumference of the two codends is estimated to be about the same. The netting material of both was the same as the netting used in commercial fisheries in the area.

*Nephrops* fishing is generally conducted on soft sediments, where the action of the trawl gear tends to cause resuspension of sediment. Hence, visibility is poor and divergence between visual observations and actual catch may arise under these conditions (Krag *et al.*, 2009b). Alternatives to visual observations for quantifying the reaction of fish to different netting panels are therefore needed. For this purpose, we developed a codend cover that was divided horizontally, providing an upper and a lower compartment (Figure 2). The horizontal partitioning panel in the cover constrained escapees to either the upper or the lower compartment, depending on the panel of the codend through which they escaped. The design, therefore, allowed estimation of the fractions of each species that escaped upwards or downwards through the codend. This novel cover design was developed and tested in full scale in the Hirtshals flume tank before the sea trials. Covers were made of polyethylene netting with a measured mesh size of 36.4 mm. A combination of kites, weights, and floats, as prescribed by Madsen *et al.* (2001), was used to maintain the geometry of the covers during fishing (Figure 2). The drag of this type of cover is expected to be relatively low (Madsen *et al.*, 2001). In both codends, the horizontal partitioning panel in the cover was attached to the seam of the codend, and the netting of the panel was orientated to form diamond-meshes. This design should minimize the influence of the cover on the mesh openings of the codend and leave the partitioning panel slack enough to allow movements of the codend. Inspection of the standard DMC with cover in the flume tank demonstrated that these requirements were met. Furthermore, the codend was clearly capable of assuming the bulbous shape characteristic for a diamond-mesh codend at catches as small as 150 kg. The bulbous shape causes the rows of meshes just in front of the catch build-up to be more open. To be able to conclude that fish and *Nephrops* that ended up in either the upper or the lower cover compartment had escaped through the corresponding panel of the codend, it is essential that no exchange between the two compartments is possible. The horizontal partitioning panel was made of the same small-mesh netting as the covers, and from the codline, the cover was divided into two separate compartments (upper and lower; Figure 2). As fish escape mainly through the open meshes just in front of the catch build-up, the distance they travel before they end up in the separate compartments is short. A potential exchange between the covers of the smallest fish is therefore restricted almost totally.

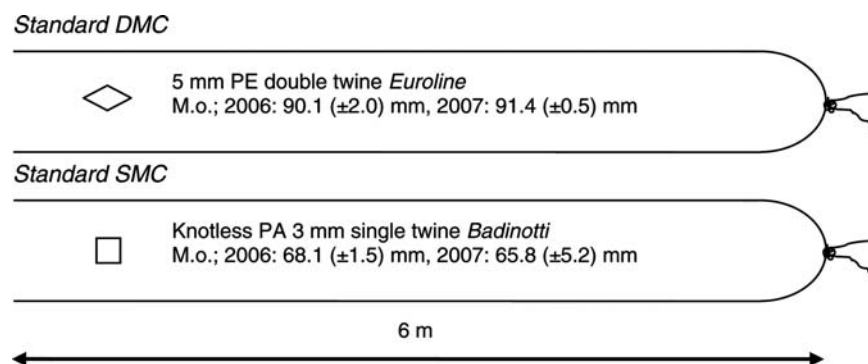

**Figure 1.** Experimental codends. M.o., mean mesh sizes measured by the ICES 4 kg wedge (95% confidence limits are in parenthesis); PE, polyethylene; PA, polyamide. Before and after the trials, 50 codend meshes were measured in a dry and a wet condition, respectively.

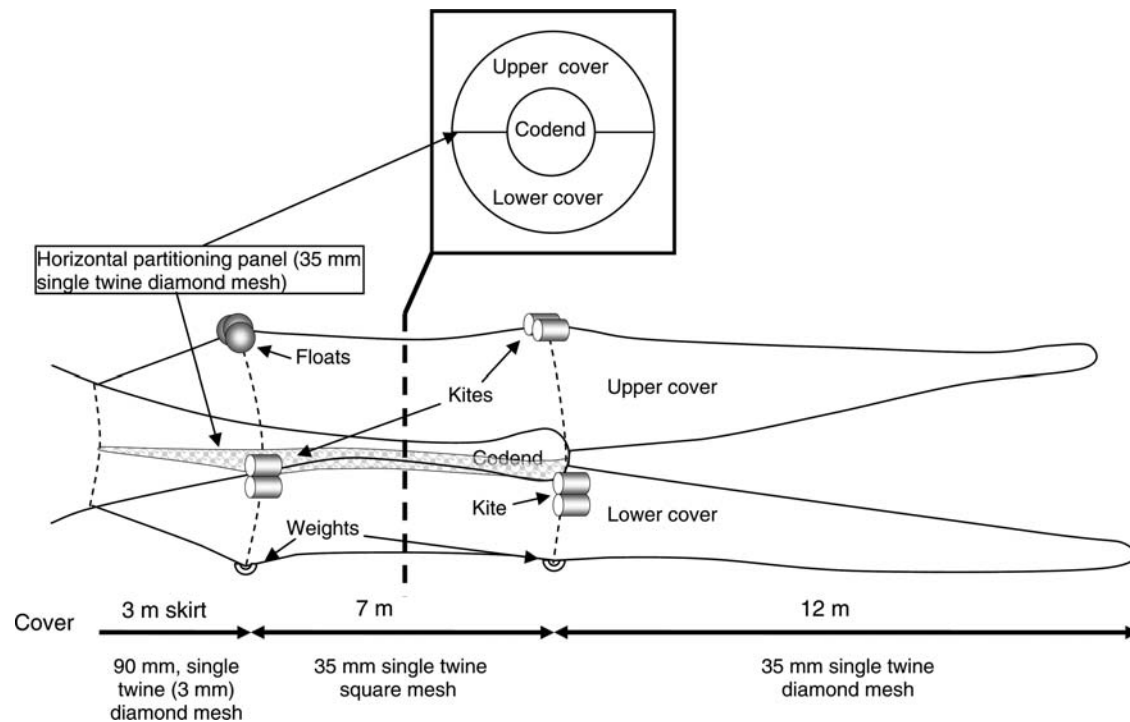

**Figure 2.** Cover design in cross section (upper drawing), and as seen from the side (lower drawing). The point at which the cross section is taken is indicated on the side view by a broken line.

### Sea trials

Two cruises were conducted on-board commercial vessels in the Kattegat and the Skagerrak in 2006 and 2007 (Figure 3). In September 2006, the 294 kW stern trawler FN234 “Canopus” was used. It was rigged for twin-trawling with two identical trawls, which were combined fish and *Nephrops* trawls with a nominal mesh size of 80 mm and a circumference of 480 meshes. Design of the vessel limited the size of the cover catch that could be processed, so in 2007 a new vessel that allowed larger catches to be processed, and hence longer hauls, was chartered. In August 2007, the 386 kW stern trawler RS30 “Mette Amalie” was used. Like the “Canopus”, it was rigged for twin-trawling with combined fish and *Nephrops* trawls with a nominal mesh size of 100 mm and circumference of 460 meshes. Choice of fishing ground was based on skipper knowledge of catch distribution of the primary target species of the study; *Nephrops*, cod, and plaice. The two cruises therefore differed in vessel, trawl, and catch size, so the results can indicate the sensitivity of the selectivity of the codends to such differences. In both years, the two test codends with covers fished simultaneously in the twin-trawl rig, and to avoid bias attributable to differences in performance between starboard and port trawls, the codends were interchanged throughout the cruises. In all, 24 daylight hauls with each codend design were made (Table 1).

### Measuring the catch

To minimize selection at the surface, the covers and codends of both trawls were hauled onto the deck before processing the catch. In 2006, cod, plaice, haddock, and whiting were measured to the centimetre below, and the CL of *Nephrops* to the millimetre below with electronic calipers. We used the midpoints of the

length classes in the analyses. In 2007, the number of days at sea was limited, so to optimize the number of hauls, only cod, plaice, and *Nephrops* were measured individually because these three species are the most important in this fishery. *Nephrops* and whiting catches were subsampled when large. Weight of the measured fish and *Nephrops* was estimated using month-specific length–weight conversion factors for fish (Coull *et al.*, 1989) and gender-specific conversion factors for *Nephrops* (ICES, 1995). Total catch weight was taken as the sum of the weight of the measured fish and the weight of the rest of the catch, including debris.

### Data analysis

Data from the two cruises were analysed separately. For estimating the selection parameters, data from the upper and the lower covers were summed for each haul of each codend. Estimates were based on unraised data, i.e. including both the raw data and the subsampling ratio. In cases of subsampling of the cover catch, a joint subsampling ratio was estimated for each length group according to the following equation: joint subsampling ratio =  $\text{count}/\text{raised}$ , where *count* is the total number of sampled animals in the upper and lower cover and the term *raised* refers to the estimated number of animals in the two cover compartments obtained by dividing the *count* in each compartment by the corresponding subsampling ratio, then adding the two estimates.

Initially, CC2000 software ([www.constat.dk](http://www.constat.dk)) was used to analyse the data on haul level. A goodness-of-fit test, referring the deviance to a  $\chi^2$  distribution (Wileman *et al.*, 1996), showed that a logistic curve described the data well and that a lack of fit was indicated for one haul only (Table 2). Reasonable numbers

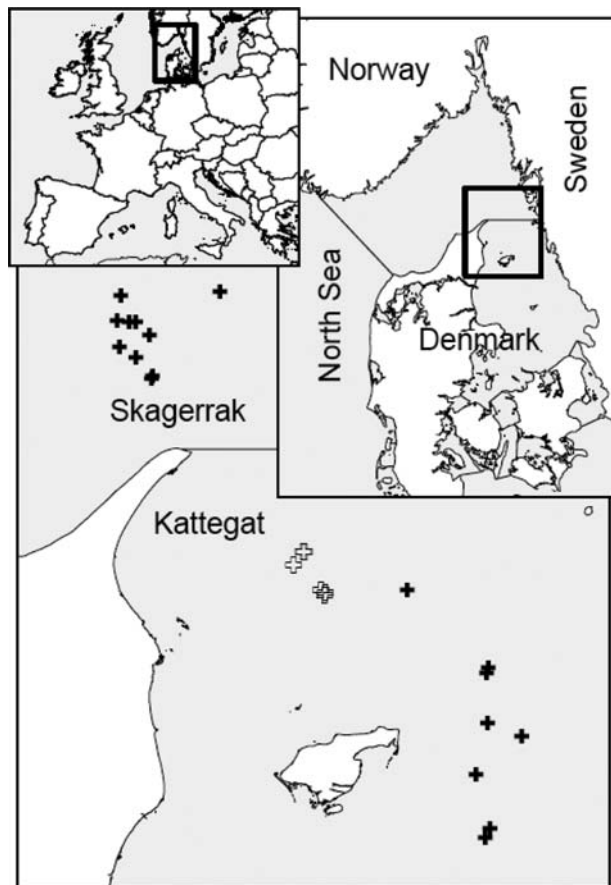

**Figure 3.** Distribution of hauls in 2006 (black crosses) and 2007 (white crosses). The overview map shows the location of the Danish fishing area.

of all species were caught in most hauls, with plaice in 10 hauls of the 2006 sea trials as the only exception (Table 2). The size distributions of haddock and whiting fitted their selective range in the standard DMC, but not in the standard SMC, and vice versa for *Nephrops*. The few individuals in the selective range resulted in a lack of convergence when analysing data on a haul level (Table 2). Subsequent combination of selection curves using Fryer's model (Fryer, 1991) would therefore not include all available data, so to optimize the use of our data, we used a generalized non-linear mixed model (GNLMM). The method is described by Millar *et al.* (2004), and the complete model includes the between-haul variations of both  $L_{50}$  and SR as random variables, and gear type as the dependent variable. In cases where the complete model did not converge, parameters on haul level were inspected to evaluate whether the smallest between-haul variation was on  $L_{50}$  or SR. Excluding the between-haul variation on this parameter would always make the model converge. Non-significant effects of gear type on either  $L_{50}$  or SR were excluded from the model, and the analysis was run again. The model was fitted with the NLMIXED procedure available in the statistical software package SAS, as prescribed by Millar *et al.* (2004). When comparing  $L_{50}$  or SR between the two codends, we used the significance estimates provided by the model. Overlap of the 95% confidence limits of the parameters was used to compare the selectivity of the codends between the two years.

The data were first raised by use of the subsampling ratio, then the direction of escapement was estimated for each haul as the number of escapees retained in the upper compartment divided by the total number of escapees. In cases in which the directions of escapement were normally distributed, the significance of the differences between the two gears was tested with a paired *t*-test. When the test for normality failed, data were instead tested using a Wilcoxon signed rank test. The correlation between direction of escapement and fish length was also tested; data for single length groups were treated as above, but length groups that contained fewer than five animals within a haul were excluded from that haul. Linear regressions based on the least-squares method were used to determine whether the slopes of the regression lines deviated significantly from zero.

## Results

In 2006, 18 hauls were conducted, and in 2007 there were 6 hauls (Table 1). In 2006, the duration of haul was limited to about 1.5 h to preclude large catches in the covers. The design of the vessel used in 2007 allowed larger catches to be handled, and the duration of haul was extended to ~3.5 h, which increased the mean catches in the test codends from 184 to 284 kg and from 126 to 309 kg for the standard DMC and the standard SMC, respectively (Table 1). The composition of the catch differed between years (Table 2). By weight, the mean catches of *Nephrops* ranged from 18.5 to 21.5 kg per haul, with no difference between years, whereas catches of cod were ~85% lower in 2007 than in 2006 and catches of plaice were three times higher in 2007. Subsampling ratios of *Nephrops* and whiting ranged from 0.11 to 0.75.

## Selection parameters

For the roundfish cod, haddock, and whiting, the NLMIXED model yielded significantly ( $p < 0.001$ ) higher estimates of  $L_{50}$  for the standard SMC than for the standard DMC, differences ranging from 9 to 15 cm (Table 3). In 2006, the modelled SR estimates were significantly ( $p < 0.05$ ) higher in the standard SMC for cod and haddock. For whiting in 2006 and cod in 2007, no significant ( $p > 0.05$ ) difference between the estimated SR values for the two gear types was found, so the gear effect on SR was excluded from the NLMIXED model in these cases.

The NLMIXED model yielded significantly ( $p < 0.001$ ) lower estimates of  $L_{50}$  for plaice for the standard SMC than for the standard DMC, differences ranging from 4 to 6 cm (Table 3). The reduction in  $L_{50}$  corresponds to the difference in mesh size between the codends, so the resulting selection factors ( $SF = L_{50}/\text{mesh size}$ ) are similar (Table 3). A significant ( $p < 0.05$ ) difference in SR estimates between codends was found only in 2007; the estimate of the standard DMC was 1.3 cm greater than that of the standard SMC.

*Nephrops* were collected both in 2006 and 2007, and estimates are given in Table 3. For both years, the NLMIXED model yielded significantly ( $p < 0.0001$ ) higher estimates of  $L_{50}$  for the standard SMC than for the standard DMC. The SR estimates were significantly ( $p < 0.01$ ) higher for the standard SMC in 2007, but there was no significant difference in 2006.

Cod, *Nephrops*, and plaice were measured in both years, and a small increase in the estimated  $L_{50}$  was detected for all three species in the standard DMC in 2007 compared with 2006. However, the increase in  $L_{50}$  was not significant ( $p > 0.05$ ), nor were the differences in SR between years (Figure 4). For the standard SMC, the

**Table 1.** Operational conditions for all hauls in 2006 and 2007 together with mean and standard deviation.

| Haul id | Vessel | Date      | Latitude | Longitude | Duration (h) | Wave height (m) | Speed (knots) | Wire length (m) | Depth (m) | Door distance (m) | Total catch in test codend (kg) |              |
|---------|--------|-----------|----------|-----------|--------------|-----------------|---------------|-----------------|-----------|-------------------|---------------------------------|--------------|
|         |        |           |          |           |              |                 |               |                 |           |                   | Standard DMC                    | Standard SMC |
| 1_2006  | FN234  | 9/21/2006 | 57.5323  | 11.2361   | 1:00         | 0.75            | 2.6           | 125             | 43        | 85                | 110                             | 121          |
| 2_2006  | FN234  | 9/21/2006 | 57.4110  | 11.4523   | 1:00         | 0.75            | 2.6           | 150             | 60        | 85                | 101                             | 94           |
| 3_2006  | FN234  | 9/22/2006 | 57.4041  | 11.4464   | 1:30         | 0.5             | 2.5           | 150             | 62        | 85                | 174                             | 159          |
| 4_2006  | FN234  | 9/22/2006 | 57.3065  | 11.5369   | 1:30         | 0.75            | 2.6           | 150             | 63        | 86                | 85                              | 57           |
| 5_2006  | FN234  | 9/23/2006 | 57.3291  | 11.4442   | 1:30         | 1.25            | 2.6           | 150             | 66        | 85                | 151                             | 120          |
| 6_2006  | FN234  | 9/23/2006 | 57.2533  | 11.4085   | 1:30         | 1.25            | 2.6           | 150             | 67        | 85                | 233                             | 124          |
| 7_2006  | FN234  | 9/24/2006 | 57.1571  | 11.4269   | 1:30         | 0.5             | 2.6           | 150             | 64        | 85                | 298                             | 313          |
| 8_2006  | FN234  | 9/24/2006 | 57.1722  | 11.4413   | 1:00         | 0.5             | 2.6           | 150             | 73        | 86                | 541                             | 315          |
| 9_2006  | FN234  | 9/25/2006 | 57.9056  | 10.4538   | 1:00         | 0.5             | 2.6           | 200             | 106       | 86                | 122                             | 62           |
| 10_2006 | FN234  | 9/25/2006 | 57.8888  | 10.4997   | 1:30         | 0.5             | 2.6           | 200             | 110       | 86                | 152                             | 59           |
| 11_2006 | FN234  | 9/26/2006 | 57.9445  | 10.4492   | 1:30         | 0.5             | 2.6           | 200             | 103       | 85                | 198                             | 70           |
| 12_2006 | FN234  | 9/26/2006 | 57.9413  | 10.4999   | 3:00         | 0.5             | 2.6           | 200             | 114       | 85                | 216                             | 137          |
| 13_2006 | FN234  | 9/27/2006 | 57.9227  | 10.5380   | 1:30         | 0.5             | 2.6           | 200             | 120       | 86                | 102                             | 59           |
| 14_2006 | FN234  | 9/27/2006 | 57.9826  | 10.4606   | 1:30         | 0.7             | 2.6           | 200             | 109       | 86                | 166                             | 100          |
| 15_2006 | FN234  | 9/28/2006 | 57.9831  | 10.7382   | 1:30         | 0.7             | 2.6           | 300             | 184       | 86                | 120                             | 160          |
| 16_2006 | FN234  | 9/28/2006 | 57.9412  | 10.4822   | 1:30         | 0.6             | 2.6           | 200             | 110       | 87                | 176                             | 84           |
| 17_2006 | FN234  | 9/28/2006 | 57.8612  | 10.5442   | 1:30         | 0.5             | 2.6           | 200             | 106       | 87                | 190                             | 124          |
| 18_2006 | FN234  | 9/29/2006 | 57.8570  | 10.5409   | 1:30         | 0.5             | 2.6           | 200             | 109       | 87                | 167                             | 106          |
|         |        |           |          | Mean      | 1:28         | 0.7             | 2.6           | 181.9           | 92.9      | 85.8              | 183.5                           | 125.8        |
|         |        |           |          | s.d.      | 0:26         | 0.24            | 0.02          | 40.04           | 33.49     | 0.73              | 104.09                          | 75.85        |
| 1_2007  | RS30   | 8/22/2007 | 57.5360  | 10.9973   | 3:01         | 1.5             | 2.5           | 235             | 36        | 100               | 330                             | 380          |
| 2_2007  | RS30   | 8/22/2007 | 57.5738  | 10.9231   | 3:06         | 1.5             | 2.6           | 235             | 30        | 101               | 320                             | 285          |
| 3_2007  | RS30   | 8/23/2007 | 57.5299  | 11.0084   | 3:13         | 0.5             | 2.6           | 235             | 36        | 100               | 355                             | 335          |
| 4_2007  | RS30   | 8/23/2007 | 57.5923  | 10.9539   | 4:00         | 0.4             | 2.6           | 235             | 32        | 98                | 217                             | 254          |
| 5_2007  | RS30   | 8/24/2007 | 57.5269  | 11.0066   | 3:20         | 0.4             | 2.6           | 235             | 35        | 98                | 300                             | 420          |
| 6_2007  | RS30   | 8/24/2007 | 57.5935  | 10.9502   | 4:02         | 0.6             | 2.6           | 235             | 32        | 100               | 180                             | 180          |
|         |        |           |          | Mean      | 3:27         | 0.8             | 2.6           | 235.4           | 33.5      | 99.5              | 283.7                           | 309.0        |
|         |        |           |          | s.d.      | 0:27         | 0.55            | 0.04          | 0.00            | 2.43      | 1.22              | 69.30                           | 87.50        |

only significant ( $p < 0.05$ ) difference in selection parameter estimates between the two years was the  $L_{50}$  for *Nephrops*, which was higher in 2006 (Figure 4).

### Vertical direction of escapement

Only *Nephrops* and whiting showed a pronounced preference in the direction of escapement in both gears and in all hauls based on all length groups combined (Figure 5). Therefore, depending on codend design, 85.0–93.7% of the *Nephrops* escaped downwards through the lower panel of the codend, whereas 66.8–90.9% of the whiting escaped upwards through the upper panel. For some species, the type of codend had a significant effect on escapement behaviour. Both haddock and whiting showed a significantly ( $p < 0.05$ ) different preference in the direction of escapement in the two codend types. For both species, more fish escaped upwards in the standard SMC (Figure 5).

Plots of the direction of escapement vs. length revealed significant correlations for several species (Figure 6). Although significantly different from zero, the slope of the regression line was negligible ( $< 0.01$ ) usually. However, cod in both codends and haddock, plaice, and whiting in the standard DMC showed a pronounced negative relationship between the length and the direction of escapement. A pronounced positive relationship was found only for haddock and plaice in the standard SMC.

### Discussion

Our novel cover design worked well and allowed estimation of both selection parameters and evaluation of the vertical direction of escapement. The relationship between length and preference of direction of escapement was consistent for the entire size range, demonstrating that any migration of small individuals between the two compartments of the cover was minimal. The results demonstrate that the selective properties of a standard SMC and a standard DMC differ significantly, and that the optimum mesh shape is species-specific. The selectivity of the two codends was consistent between trials, with *Nephrops* in the standard SMC being the only exception. Selectivity of *Nephrops* may be affected by the catch composition which, in 2006, was dominated by *Nephrops* and roundfish and, in 2007, by *Nephrops* and flatfish.

The relatively small vessel (characteristic for the fishery) and hence the difficulty in handling the covers restricted the catch weight that could be handled in the experiment. A rough estimate of commercial catch sizes, including discards, can be made from the Danish discard database by extracting data on standard 90 mm codends for the past 5 years. For vessels below medium size ( $< 400$  hp), catch weights ranged from 158 to 1400 kg for the Kattegat ( $n = 27$ , 24 of which were within the range of catches of the standard DMC, 85–541 kg), and from 92 to 1481 kg for the Skagerrak ( $n = 50$ , 20 of which were within the range of our experiments). The total catch rates obtained in the present study are therefore within the norm for the fishery, and also within the range of results previously reported as being similar to normal

**Table 2.** The number of each species caught in the codend/cover (upper+lower). Lack of convergence of the haul-based model is shown by an asterisk (\*). A lack of fit ( $p < 0.05$ ) is shown by a double asterisk (\*\*) if the goodness of fit, referring the deviance to a Chi-squared distribution, indicates it.

| Haul  | Standard DMC |             |              |           |             | Standard SMC |          |              |           |          |
|-------|--------------|-------------|--------------|-----------|-------------|--------------|----------|--------------|-----------|----------|
|       | Cod          | Haddock     | Nephrops     | Plaice    | Whiting     | Cod          | Haddock  | Nephrops     | Plaice    | Whiting  |
| 2006  |              |             |              |           |             |              |          |              |           |          |
| 1     | 16/177       | 387/734     | 25/5         | 103/14    | 172/681     | 8/258        | 0/1246*  | 13/18        | 115/1     | 1/907*   |
| 2     | 43/159       | 143/243     | 244/10       | 130/47    | 187/433     | 14/391       | 0/399*   | 120/119      | 181/1     | 0/601*   |
| 3     | 73/289       | 80/393      | 1 477/98     | 151/74    | 225/394     | 38/268       | 3/631    | 758/927      | 195/13    | 0/635*   |
| 4     | 27/82        | 49/51       | 1 000/122    | 15/5      | 147/270     | 3/86*        | 2/112*   | 365/1 127    | 10/0*     | 0/443*   |
| 5     | 70/142       | 76/162      | 1 035/178    | 94/12     | 238/286     | 30/238       | 2/481    | 458/1 210    | 89/4      | 7/895    |
| 6     | 66/358       | 16/47       | 302/32       | 65/4      | 266/943     | 56/339       | 6/65     | 153/190      | 60/1      | 5/1 153  |
| 7     | 98/505       | 8/9         | 706/62       | 103/4     | 181/1 270   | 58/517       | 7/25     | 443/494      | 123/1     | 5/1 646  |
| 8     | 62/169       | 15/23       | 94/18        | 78/6      | 114/820     | 54/132       | 12/50    | 66/111       | 104/1     | 9/1 311  |
| 9     | 137/136      | 40/61       | 1 566/68     | 0/0*      | 153/14      | 23/201       | 4/99*    | 364/1 273    | 1/0*      | 2/150*   |
| 10    | 122/145      | 37/49       | 2 317/171    | 1/0*      | 108/24      | 25/172       | 2/76*    | 427/2 022    | 0/0*      | 2/129*   |
| 11    | 86/100       | 12/17       | 5 621/848    | 0/0*      | 60/11       | 29/226       | 1/36     | 897/5 075    | 0/0*      | 4/99     |
| 12    | 114/165      | 20/57       | 2 890/528    | 0/0*      | 131/22      | 45/217       | 5/53*    | 811/3 162    | 0/0*      | 6/111    |
| 13    | 87/74        | 23/32       | 615/80       | 1/0*      | 85/17       | 32/161       | 3/35     | 189/495**    | 0/0*      | 1/74     |
| 14    | 85/106       | 44/87       | 3 317/294    | 0/0*      | 104/29      | 33/186       | 0/87*    | 1 142/2 952  | 0/0*      | 4/121    |
| 15    | 34/0*        | 0/0*        | 28/0*        | 1/0*      | 6/1*        | 32/6         | 0/4*     | 14/32        | 0/0*      | 0/3*     |
| 16    | 91/95        | 15/27       | 4 504/420    | 1/0*      | 93/17       | 26/194       | 0/46*    | 1 353/4 004  | 0/0*      | 3/128    |
| 17    | 172/235      | 101/186     | 1 322/151    | 1/0*      | 213/28      | 47/380       | 29/283   | 302/1 012    | 0/0*      | 5/203    |
| 18    | 143/139      | 82/107      | 207/18       | 1/0*      | 349/39      | 63/210       | 14/214*  | 44/158       | 0/0*      | 8/515    |
| Total | 1 526/3 076  | 1 148/2 285 | 27 270/3 103 | 745/166   | 2 832/5 299 | 616/4 182    | 90/3 942 | 7 919/24 382 | 878/22    | 62/9 124 |
| 2007  |              |             |              |           |             |              |          |              |           |          |
| 1     | 18/3         | Na          | 2 158/106    | 90/104    | Na          | 10/30        | Na       | 1 673/1 164  | 170/9     | Na       |
| 2     | 34/2         | Na          | 42/3         | 147/172   | Na          | 33/29        | Na       | 13/38        | 268/58    | Na       |
| 3     | 37/6         | Na          | 2 519/30     | 208/107   | Na          | 7/56         | Na       | 1 651/642    | 181/17    | Na       |
| 4     | 9/9          | Na          | 148/4*       | 100/294   | Na          | 11/62        | Na       | 70/58        | 321/47    | Na       |
| 5     | 18/13        | Na          | 2 570/160    | 134/209   | Na          | 4/28         | Na       | 2 348/1 182  | 250/24    | Na       |
| 6     | 17/17        | Na          | 56/6         | 90/269    | Na          | 3/17*        | Na       | 56/42        | 209/19    | Na       |
| Total | 133/50       | Na          | 7 493/309    | 769/1 155 | Na          | 68/222       | Na       | 5 811/3 126  | 1 399/174 | Na       |

**Table 3.** Parameter values estimated using the NLMIXED model.

| Species  | Year              | Standard DMC               |                      |      |             | Standard SMC               |                      |      |             |
|----------|-------------------|----------------------------|----------------------|------|-------------|----------------------------|----------------------|------|-------------|
|          |                   | $L_{50}$ (cm) <sup>a</sup> | SR (cm) <sup>a</sup> | SF   | $L_{50}/SR$ | $L_{50}$ (cm) <sup>a</sup> | SR (cm) <sup>a</sup> | SF   | $L_{50}/SR$ |
| Cod      | 2006 <sup>b</sup> | 15.03 (14.34–15.72)        | 3.28 (2.59–3.98)     | 1.60 | 4.58        | 26.92 (26.24–27.60)        | 4.40 (3.63–5.17)     | 3.80 | 6.12        |
|          | 2007 <sup>c</sup> | 16.86 (14.03–19.68)        | 6.28 (3.63–8.93)     | 1.77 | 2.68        | 26.33 (23.77–28.90)        | 6.28 (3.63–8.93)     | 3.85 | 4.19        |
| Haddock  | 2006 <sup>d</sup> | 15.17 (14.66–15.68)        | 3.25 (2.94–3.56)     | 1.62 | 4.67        | 26.30 (25.15–27.44)        | 4.07 (3.48–4.67)     | 3.72 | 6.46        |
| Nephrops | 2006 <sup>c</sup> | 16.71 (14.66–18.76)        | 14.71 (13.27–16.15)  | 0.18 | 1.14        | 41.18 (39.17–43.20)        | 14.71 (13.27–16.15)  | 0.58 | 2.80        |
|          | 2007 <sup>d</sup> | 18.35 (12.44–24.25)        | 11.73 (9.21–14.23)   | 0.19 | 1.56        | 31.00 (26.31–35.69)        | 17.90 (14.89–20.91)  | 0.45 | 1.73        |
| Plaice   | 2006 <sup>e</sup> | 19.07 (18.30–19.84)        | 3.45 (2.90–4.00)     | 2.03 | 5.53        | 14.61 (13.34–15.88)        | 3.45 (2.90–4.00)     | 2.06 | 4.23        |
|          | 2007 <sup>b</sup> | 19.76 (18.93–20.59)        | 3.60 (2.85–4.35)     | 2.08 | 5.49        | 13.89 (12.98–14.79)        | 2.34 (1.58–3.11)     | 2.03 | 5.94        |
| Whiting  | 2006 <sup>e</sup> | 18.10 (17.28–18.92)        | 3.61 (3.43–3.79)     | 1.93 | 5.01        | 33.47 (32.47–34.46)        | 3.61 (3.43–3.79)     | 4.73 | 9.27        |

SF =  $L_{50}/(\text{measured mesh size} \times 1.04)$ , where 1.04 is the approximated conversion factor between the ICES gauge and the EU wedge (Ferro and Xu, 1996).

Data in parenthesis are the 95% confidence limits.

<sup>a</sup>Estimates for *Nephrops* are in mm.

<sup>b</sup>Complete model including gear effect and between-haul variation on both SR and  $L_{50}$ .

<sup>c</sup>Model including gear effect on  $L_{50}$  and between-haul variation on both SR and  $L_{50}$ .

<sup>d</sup>Model including gear effect on SR and  $L_{50}$  but between-haul variation only on  $L_{50}$ .

<sup>e</sup>Model including gear effect and between-haul variation on  $L_{50}$  only.

practice in the Swedish *Nephrops* fishery (Valentinsson and Ulmestrand, 2008). Our results are therefore considered to be representative of smaller vessels in *Nephrops*-directed fisheries. However, this restriction in representativeness may change soon with the implementation of highly selective devices, such as grids (Catchpole et al., 2006; Valentinsson and Ulmestrand, 2008; Frandsen et al., 2009) and escape windows (Madsen et al., 2010). These additional devices are expected to reduce the codend catch

weight substantially, and they have already been enforced seasonally in part of the Kattegat, to protect the cod stock.

### Selection parameters

Selection factors (SF =  $L_{50}/\text{mesh size}$ ) can be used to compare our results with the results of previous experiments on *Nephrops*-directed fisheries. As twine thickness influences the selectivity of a codend (Lowry, 1995; Herrmann and O'Neill,

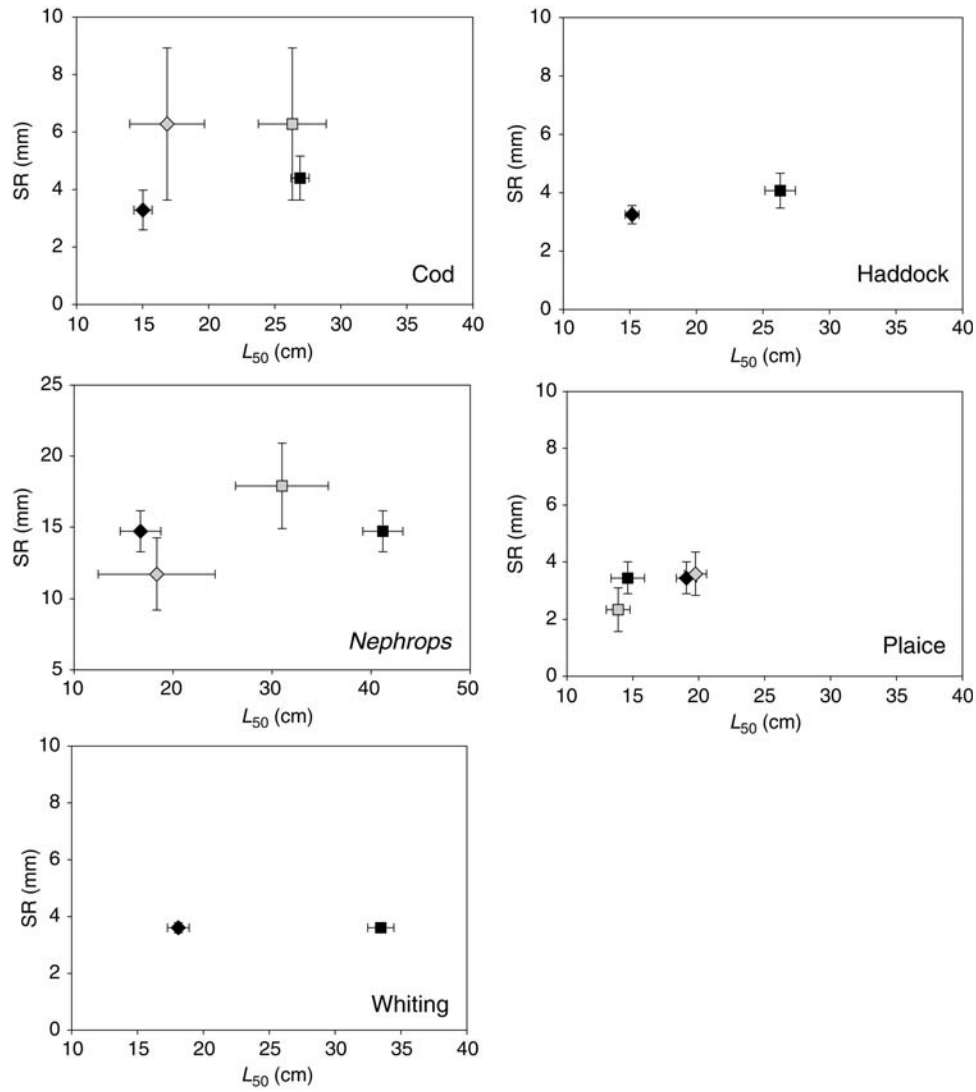

**Figure 4.** Parameter estimates for different species obtained using the NLMIXED model. Black symbol, 2006 data; grey symbol, 2007 data; squares, standard SMC; diamonds, standard DMC. Error bars indicate the 95% confidence limits around the mean.

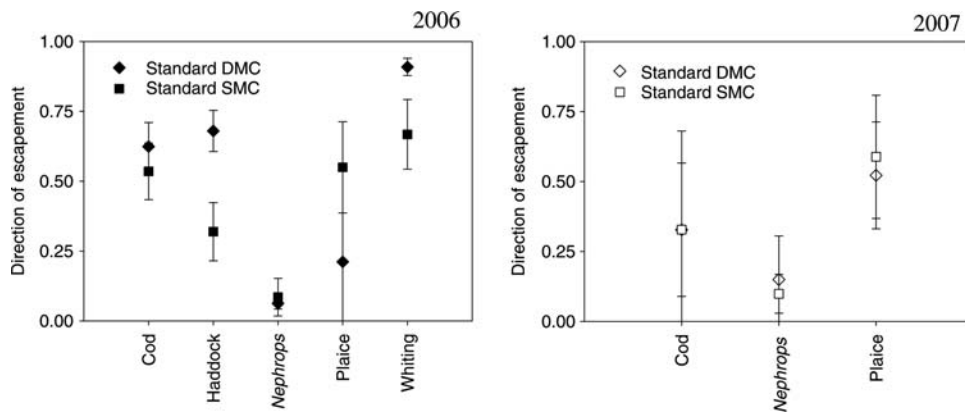

**Figure 5.** Vertical direction of escapement in 2006 and 2007. Estimates are based on raised data summed over all length groups. For each haul, the direction of escapement was estimated as the fraction of escapees retained in the upper cover. The symbols illustrate the means of all hauls, and the error bars show the 95% confidence limits.

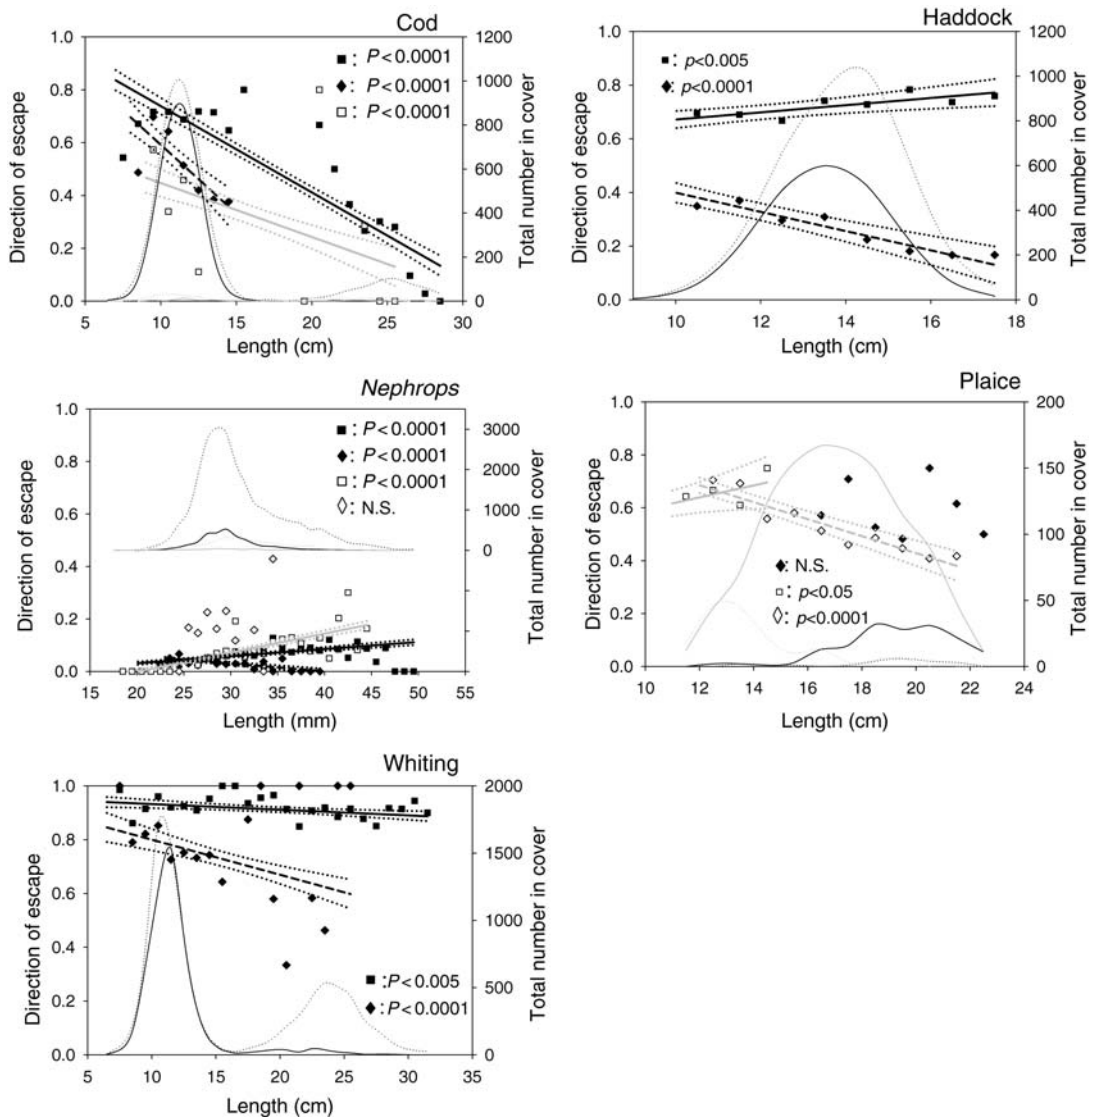

**Figure 6.** Relationship between the vertical direction of escapement and length (left y-axis) and length distribution of fish retained in the cover (right y-axis). For each length group, the direction of escapement was estimated as the fraction of escapees retained in the upper cover (squares and diamonds), and the regression lines based on the data at a haul level were estimated (bold lines), with standard SMC, squares and solid lines; standard DMC, diamonds and broken lines; dotted lines, the 95% confidence band of the regression; 2006, black symbols and black lines; 2007, white symbols and grey lines. Statistics on the slope of the regression are given. N.S., no significant deviation from zero. Numbers retained in the cover are shown as thin lines, with standard SMC, dotted lines; standard DMC, solid lines; 2006, black lines; 2007, grey lines.

2006), only experiments testing codends made of netting reasonably similar to that tested here were used when evaluating the estimated selection parameters.

The SF values for cod, haddock, *Nephrops*, plaice, and whiting in the standard DMC were all low compared with the SF estimates reported previously (cod, 2.4; haddock, 2.4–2.6; *Nephrops*, 0.28–0.38; plaice, 2.3; whiting, 2.7; Madsen *et al.*, 2008; Frandsen *et al.*, 2009). Small catches limit the opening of diamond-meshes and result in lower estimates of  $L_{50}$  (O'Neill and Kynoch, 1996; Herrmann, 2005), and this effect may be increased by the thick double twine used in this experiment. Although catches increased by >50% in 2007, they were still at the lower end of catches evaluated by the studies referred to above. The mean catch weights of those studies ranged from 300 to 393 kg. Based on simulations, it is predicted that an increase in catch weight from ~170 to

~290 kg in a diamond-mesh codend (100 mm, 100 meshes around) will lead to an increase in the  $L_{50}$  of haddock by 4–5 cm, whereas a catch increase from 170 to ~500 kg may increase the  $L_{50}$  of haddock by as much as 10 cm (Herrmann, 2005). The increase in catches in the standard DMC from 2006 to 2007 did not result, however, in a significant ( $p > 0.05$ ) increase in the  $L_{50}$  of any of the three species that we measured in both years.

For the standard SMC, comparable selection estimates are available for *Nephrops* only. The SF estimate for *Nephrops* in the standard SMC was within the range of the earlier studies (*Nephrops*, 0.40–0.63; Larsvik and Ulmestrand, 1992; Stergiou *et al.*, 1997; Campos *et al.*, 2002; Bahamon *et al.*, 2006; Sala *et al.*, 2008; Sala and Lucchetti, 2010).

In general, the standard SMC yielded higher estimates of  $L_{50}$ /SR for all roundfish species and *Nephrops* than did the standard



DMC. For these species, therefore, an increase in  $L_{50}$  is not associated with a proportional increase in SR, and the standard SMC hence has better selective properties for roundfish and *Nephrops*. In contrast, plaice gave the highest estimates of  $L_{50}$  in the standard DMC; SF values of the two codends were, however, comparable. The standard DMC was expected to have better selective properties for plaice, but the relatively soft and thin netting (3 mm polyamide vs.  $2 \times 5$  mm polyethylene) of the standard SMC, in combination with the relatively small catches, may explain why the difference between the two codends was not pronounced in the present experiment.

### Vertical direction of escapement

In line with the results of previous investigations (Hillis and Earley, 1982), *Nephrops* escaped almost exclusively through the lower panel of the codend. Interestingly, the only fish species that exhibited a distinct preference in the direction of escapement was whiting, which primarily escaped upwards. Haddock, which has previously been shown to stay high in the extension piece (Krag *et al.*, 2009a), and escape through square-mesh windows in the top panel of the codend (Madsen *et al.*, 1999; Graham *et al.*, 2003, Frandsen *et al.*, 2009), only showed this preference in direction of escapement in the standard SMC; haddock caught in the standard DMC tended to escape downwards.

The swimming speed of fish is size-dependent (Breen *et al.*, 2004), so because the fish escaping from the codend are small, their ability to navigate within the trawl cavity could be expected to be limited. However, the maximum sustainable swimming speed of a haddock 16 cm long is 0.8 knots (Breen *et al.*, 2004), and at a towing speed of 2.9 knots, water flow in a partially fish-filled codend has been found to range from 0 to 0.6 knots (Main and Sangster, 1981). On the basis of this knowledge, we assume that a pronounced direction of escapement, at least for the larger escapees, reflects a species-specific preference.

The differences between the observed preferences in terms of direction of escape in this and in previous work are not necessarily contradictory, because the present setup did not include an alternative escape route, as do experiments with square-mesh panels. It is likely that introducing such a selective device in the standard DMC would alter the preferred direction of escape of species such as haddock, for which behaviour has previously been shown to be influenced by visual cues (Glass and Wardle, 1989).

The natural behaviour of most fish is to stay clear of netting, and this natural avoidance response can be modified by manipulating the visual stimulus presented by the netting panel (Glass *et al.*, 1993). The contrast of the netting used for the two codends is expected to be different, because the standard DMC is constructed of dark (green) heavy ( $2 \times 5$  mm) twine, whereas the standard SMC is made of white thinner ( $1 \times 3$  mm) twine. All fishing was conducted during daylight, so we assume that the standard SMC presented a lower contrast in the light from the surface and may therefore appear a more attractive escape route. Rather than the difference in mesh shape, these factors may explain the different behaviour of some of the species in the standard SMC and the standard DMC.

Length-dependent differences in vertical preference of fish in trawls have been observed for several species, including haddock, cod, whiting, and plaice (Holst and Revill, 2009; Holst *et al.*, 2009). In our study, cod in particular exhibited a pronounced length-dependence, with small fish escaping upwards and larger

fish escaping downwards. This is in contrast to the behavioural pattern found farther forward in the trawl (Holst and Revill, 2009; Holst *et al.*, 2009). However, those studies investigated larger fish, so the slope of the regression lines is not comparable with those found here.

### Conclusions

The results of our study have confirmed the belief that the selectivity of the conventionally used standard DMC is poor, and they further suggest that this is particularly so in the cases of small catches and relatively thick double twine. Owing to the relatively small catches, the outcome of this study is most applicable to *Nephrops*-directed fisheries under similar conditions. In future, such conditions are probably to result from implementation of highly selective devices that are expected to reduce the codend catch weight substantially.

The selective properties of the 70 mm standard SMC are significantly better for *Nephrops* and roundfish than those of the 90 mm standard DMC. The use of a standard SMC is therefore expected to reduce discards of these species significantly. However, the estimated selection parameters for *Nephrops* in the standard SMC demonstrate that using a mesh size of 70 mm would result in loss of legal-sized ( $>40$  mm CL) catch. In terms of plaice, the selectivity of the 70 mm standard SMC is more in conflict with the regulations on MLS (27 cm) than the selectivity of the 90 mm standard DMC. The use of a standard SMC would therefore be expected to increase the discarding of that species.

The positive effect of combining mesh shapes has previously been attained by inserting square-mesh windows in diamond-mesh codends, but the aim of those gears was primarily to reduce the discarding of roundfish. The results of the present study demonstrate the potential benefits of combining different nettings in the codend to improve the selectivity of a wider range of species in mixed-species fisheries.

Our study has shown that only whiting and *Nephrops* have a strong preference to escape either from the upper or the lower panel. For those species, an additional escape panel with an optimized netting configuration would theoretically influence the selectivity only if it is placed in their preferred direction of escapement. For all other species, we would expect such a panel potentially to improve the selectivity of the codend, irrespective of its vertical position. However, the behavioural patterns in the codend may be altered by the visual cues introduced when different nettings are combined. Further studies of such composite codends, designed to optimize multispecies selectivity by exploiting differences in behaviour and morphology, are therefore needed. Such studies should also take the length-dependent differences in behaviour into account.

### Acknowledgements

Thanks are due to the skippers and crews of the FN234 “Canopus” and the RS30 “Mette Amalie”, to the Danish Fishermen’s Organization, to Kurt Hansen and Mogens Andersen from SINTEF, and to René Holst, Bo Lundgren, and the technical staff at DTU Aqua. The manuscript was greatly improved by comments from two anonymous reviewers. The study was conducted as part of the SELTRA project, carried out with the financial support of the European Commission and the Danish Ministry of Food, Agriculture, and Fisheries.

## References

- Bahamon, N., Sardà, F., and Suuronen, P. 2006. Improvement of trawl selectivity in the NW Mediterranean demersal fishery by using a 40 mm square mesh codend. *Fisheries Research*, 81: 15–25.
- Breen, M., Dyson, J., O'Neill, F. G., Jones, E., and Haigh, M. 2004. Swimming endurance of haddock (*Melanogrammus aeglefinus* L.) at prolonged and sustained swimming speeds, and its role in their capture by towed gears. *ICES Journal of Marine Science*, 61: 1071–1079.
- Briggs, R. P. 1992. An assessment of nets with a square mesh panel as a whiting conservation tool in the Irish Sea *Nephrops* fishery. *Fisheries Research*, 13: 133–152.
- Campos, A., Fonseca, P., and Erzini, K. 2002. Size selectivity of diamond and square mesh cod ends for rose shrimp (*Parapenaeus longirostris*) and Norway lobster (*Nephrops norvegicus*) off the Portuguese south coast. *Fisheries Research*, 58: 281–301.
- Castro, M., Araújo, A., Monteiro, P., Madeira, A. M., and Silvert, W. 2003. The efficacy of releasing caught *Nephrops* as a management measure. *Fisheries Research*, 65: 475–484.
- Catchpole, T. L., Revill, A. S., and Dunlin, G. 2006. An assessment of the Swedish grid and square mesh cod-end in the English (Farn Deep) *Nephrops* fishery. *Fisheries Research*, 81: 118–125.
- Coull, K. A., Jermyn, A. S., Newton, A. W., Henderson, G. I., and Hall, W. B. 1989. Length/weight relationships for 88 species of fish encountered in the North East Atlantic. *Scottish Fisheries Research Report* 43. 81 pp.
- Evans, S. M., Hunter, J. E., Elizal, and Wahju, R. I. 1994. Composition and fate of the catch and bycatch in the Farne Deep (North Sea) *Nephrops* fishery. *ICES Journal of Marine Science*, 51: 155–168.
- Ferro, R. S. T., and Xu, L. 1996. An investigation of three methods of mesh size measurement. *Fisheries Research*, 25: 171–190.
- Frandsen, R. P., Herrmann, B., and Madsen, N. 2010. A simulation-based attempt to quantify the morphological component of size selection of *Nephrops norvegicus* in trawl codends. *Fisheries Research*, 101: 156–167.
- Frandsen, R. P., Holst, R., and Madsen, N. 2009. Evaluation of three levels of selective devices relevant to management of the Danish Kattegat–Skagerrak *Nephrops* fishery. *Fisheries Research*, 97: 243–252.
- Fryer, R. J. 1991. A model of the between-haul variation in selectivity. *ICES Journal of Marine Science*, 48: 281–290.
- Glass, C. W., and Wardle, C. S. 1989. Comparison of the reactions of fish to a trawl gear, at high and low light intensities. *Fisheries Research*, 7: 249–266.
- Glass, C. W., and Wardle, C. S. 1995. Studies on the use of visual stimuli to control fish escape from codends. 2. The effect of a black tunnel on the reaction behaviour of fish in otter trawl codends. *Fisheries Research*, 23: 165–174.
- Glass, C. W., Wardle, C. S., and Gosden, S. 1993. Behavioural studies of the principles underlying mesh penetration by fish. *ICES Marine Science Symposia*, 196: 92–97.
- Graham, N., Kynoch, R. J., and Fryer, R. J. 2003. Square mesh panels in demersal trawls: further data relating haddock and whiting selectivity to panel position. *Fisheries Research*, 62: 361–375.
- Halliday, R. G., Cooper, C. G., Fanning, P., Hickey, W. M., and Gagnong, P. 1999. Size selection of Atlantic cod, haddock and pollock (saithe) by otter trawls with square and diamond mesh codends of 130–155 mm mesh size. *Fisheries Research*, 41: 255–271.
- Harris, R. R., and Ulmestrand, M. 2004. Discarding Norway lobster (*Nephrops norvegicus* L.) through low salinity layers – mortality and damage seen in simulation experiments. *ICES Journal of Marine Science*, 61: 127–139.
- He, P. 2007. Selectivity of large mesh trawl codends in the Gulf of Maine. 1. Comparison of square and diamond mesh. *Fisheries Research*, 83: 44–59.
- Herrmann, B. 2005. Effect of catch size and shape on the selectivity of diamond mesh cod-ends, 2. Theoretical study on haddock selection. *Fisheries Research*, 71: 15–26.
- Herrmann, B., Krag, L. A., Frandsen, R. P., Madsen, N., Lundgren, B., and Stæhr, J. 2009. Prediction of selectivity from morphological conditions: methodology and a case study on cod (*Gadus morhua*). *Fisheries Research*, 97: 59–71.
- Herrmann, B., and O'Neill, F. G. 2006. Theoretical study of the influence of twine thickness on haddock selectivity in diamond mesh cod-ends. *Fisheries Research*, 80: 221–229.
- Hillis, J. P., and Earley, J. J. 1982. Selectivity in the *Nephrops* trawl. *ICES Document CM 1982/B*: 19. 11 pp.
- Holst, R., Ferro, R. S. T., Krag, L. A., Kynoch, R. J., and Madsen, N. 2009. Quantification of species selectivity by using separating devices at different locations in two whitefish demersal trawls. *Canadian Journal of Fisheries and Aquatic Sciences*, 66: 2052–2061.
- Holst, R., and Revill, A. 2009. A simple statistical method for catch comparison studies. *Fisheries Research*, 95: 254–259.
- ICES 1995. Report of the Working Group on *Nephrops* Stocks. *ICES Document CM 1995/Assess*: 12.
- ICES 2007. Report of the Workshop on *Nephrops* Selection (WKNEPHSEL). *ICES Document CM 2007/FTC*: 01, Ref. ACFM.
- ICES 2009. Cod in Subarea IV (North Sea), Division VIIId (Eastern Channel), and IIIa West (Skagerrak), 2009. *ICES Advisory Committee on Fishery Management Working Group Advice for 2009*. *ICES Advice 2009*, Book 6. 11–31 pp.
- Jones, E. G., Summerbell, K., and O'Neill, F. 2008. The influence of towing speed and fish density on the behaviour of haddock in a trawl cod-end. *Fisheries Research*, 91: 166–174.
- Krag, L. A., Frandsen, R. P., and Madsen, N. 2008. Evaluation of simple means to reduce discards in the Kattegat–Skagerrak *Nephrops* (*Nephrops norvegicus*) fishery: commercial testing of different codends and square-mesh panels. *Fisheries Research*, 91: 175–186.
- Krag, L. A., Holst, R., and Madsen, N. 2009a. The vertical separation of fish in the aft end of a demersal trawl. *ICES Journal of Marine Science*, 66: 772–777.
- Krag, L. A., Madsen, N., and Karlsen, J. D. 2009b. A study of fish behaviour in the extension of a demersal trawl using a multi-compartment separator frame and SIT camera system. *Fisheries Research*, 98: 62–66.
- Larsvik, M., and Ulmestrand, M. 1992. Square and diamond mesh trawl codend selection on *Nephrops norvegicus* (L.), analyzed with the curve-fit method isotonic regression. *ICES Document CM1992/B36*. 11 pp.
- Lowry, N. 1995. The effect of twine size on bottom trawl cod-end selectivity. *ICES Document CM 1995/B*: 6. 6 pp.
- Madsen, N., Frandsen, R. P., Holst, R., and Krag, L. A. 2010. Development of new concepts for escape windows to minimise cod catches in Norway lobster fisheries. *Fisheries Research*, 103: 25–29.
- Madsen, N., Hansen, K. E., and Moth-Poulsen, T. 2001. The kite cover: a new concept for covered codend selectivity studies. *Fisheries Research*, 49: 219–226.
- Madsen, N., Moth-Poulsen, T., Holst, R., and Wileman, D. 1999. Selectivity experiments with escape windows in the North Sea *Nephrops* (*Nephrops norvegicus*) trawl fishery. *Fisheries Research*, 42: 167–181.
- Madsen, N., Skeide, R., Breen, M., Krag, L., Huse, I., and Soldal, A. 2008. Selectivity in a trawl codend during haul-back operation – an overlooked phenomenon. *Fisheries Research*, 91: 168–174.
- Main, J., and Sangster, G. I. 1981. A study of the fish capture process in a bottom trawl by direct observations from a towed underwater vehicle. *Scottish Fisheries Research Report*, 23. 23 pp.
- Main, J., and Sangster, G. I. 1982. A study of separating fish from *Nephrops norvegicus* L. in a bottom trawl. *Scottish Fisheries Research Report*, 24. 8 pp.

- Millar, R. B., Broadhurst, M. K., and Macbeth, W. G. 2004. Modelling between-haul variability in the size selectivity of trawls. *Fisheries Research*, 67: 171–181.
- O'Neill, F. G., and Kynoch, R. J. 1996. The effect of cover mesh size and cod-end catch size on cod-end selectivity. *Fisheries Research*, 28: 291–303.
- O'Neill, F. G., McKay, S. J., Ward, J. N., Strickland, A., Kynoch, R. J., and Zuur, A. F. 2003. An investigation of the relationship between sea state induced vessel motion and cod-end selection. *Fisheries Research*, 60: 107–130.
- Robertson, J. H. B., and Stewart, P. A. M. 1988. A comparison of size selection of haddock and whiting by square and diamond mesh codends. *ICES Journal of Marine Science*, 44: 148–161.
- Sala, A., and Lucchetti, A. 2010. The effect of mesh configuration and codend circumference on selectivity in the Mediterranean trawl *Nephrops* fishery. *Fisheries Research*, 103: 63–72.
- Sala, A., Lucchetti, A., Piccinetti, C., and Ferretti, M. 2008. Size selection by diamond- and square-mesh codends in multi-species Mediterranean demersal trawl fisheries. *Fisheries Research*, 93: 8–21.
- Stergiou, K. I., Petrakis, G., and Politou, Y. 1997. Size selectivity of diamond and square mesh cod-ends for *Nephrops norvegicus* in the Aegean Sea. *Fisheries Research*, 29: 203–209.
- Valentinsson, D., and Ulmestrand, M. 2008. Species-selective *Norway lobster* trawling: Swedish grid experiments. *Fisheries Research*, 90: 109–117.
- Walsh, S. J., Millar, R. B., Cooper, C. G., and Hilbish, T. J. 1992. Codend selection in American plaice: diamond versus square mesh. *Fisheries Research*, 13: 235–254.
- Wileman, D. A., Ferro, R. S. T., Fonteyne, R., and Millar, R. B. 1996. Manual of methods of measuring the selectivity of towed fishing gears. ICES Cooperative Research Report, 215. 126 pp.
- Wileman, D. A., Sangster, G. I., Breen, M., Ulmestrand, M., Soldal, A. V., and Harris, R. R. 1999. Roundfish and *Nephrops* survival after escape from commercial fishing gear. *In* Final report to the European Commission (FAIR-CT95-0753), Brussels.

doi:10.1093/icesjms/fsq050
